# Supplementary material
Source: PubMed Central journal article supplement (PMC4393015)

Supplementary Figure: 3-D CT scan of brother of proband at age 9 months from Family A. This CT scan shows closure of the metopic suture and a prominent metopic ridge. Surgery for metopic craniosynostosis was performed a year later.

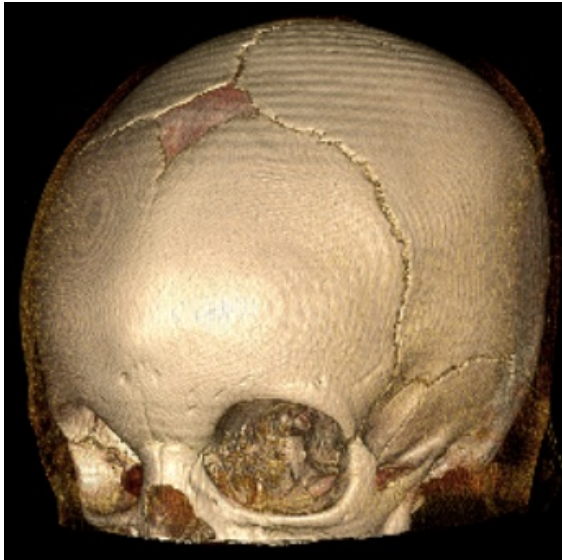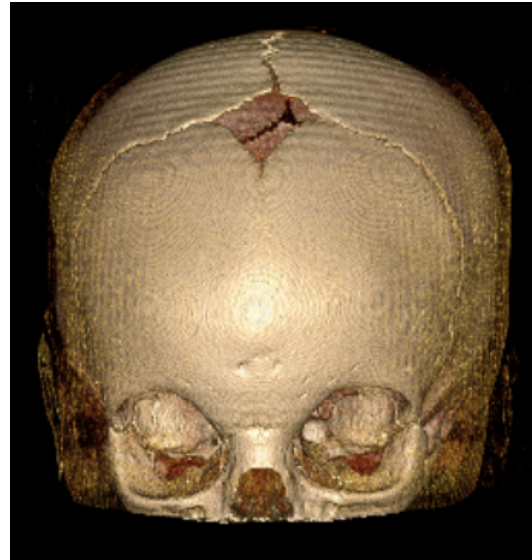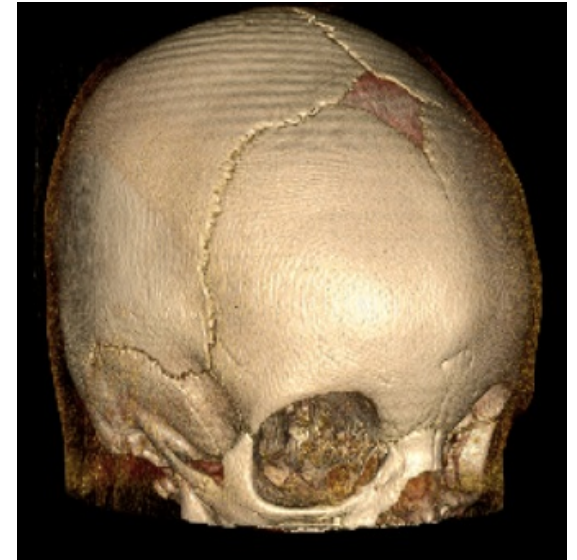

Supplement: NIHMS676805-supplement-S1.pdf [file NIHMS676805-supplement-S1.pdf]
