# Supplementary material
Source: PubMed Central journal article supplement (PMC4393015)
Supplement: NIHMS676805-supplement-S2.pdf [file NIHMS676805-supplement-S2.pdf]

**Supplementary Table 1. Sequence of primers used for amplification of SPECC1L coding exons.**

| <b>Primer name</b> | <b>Sequence (5' to 3')</b>    |
|--------------------|-------------------------------|
| SPECC1L-E3-For1    | TCTAAAGCGCTTCCTCCAG           |
| SPECC1L-E3-Rev1    | AGTGTTCCCAGCACCAGAAG          |
| SPECC1L-E4-For1    | GAAGTTCTGTTTCTGTAGGACAG       |
| SPECC1L-E4-Rev1    | TGGATGAAATGATATGATGTCCAG      |
| SPECC1L-E5_1-For1  | ACAGACTCTAAGGCAAGATTATTG      |
| SPECC1L-E5_1-Rev1  | TCAGGGACTGATAGCCAAACAG        |
| SPECC1L-E5_2-For1  | AACAGAATACTGCCATCCGTG         |
| SPECC1L-E5_2-Rev1  | TGGTGACTGCGTTCTTTGAG          |
| SPECC1L-E5_3-For1  | GTCAGCAGAGCGATAAGTTGG         |
| SPECC1L-E5_3-Rev1  | CCTCTCACAGGCAGGAAAAC          |
| SPECC1L-E6-For1    | CTCCCCTTGAAACTGTGTG           |
| SPECC1L-E6-Rev1    | TCGGTTTTGAACTCCCAAAG          |
| SPECC1L-E7-For1    | ATACTGTGGAAGGAAGTGATTTAG      |
| SPECC1L-E7-Rev1    | GGAATATTTGCACTATACTTAACAG     |
| SPECC1L-E8-For1    | AGAAATAGATACTAGCAATTCTCTG     |
| SPECC1L-E8-Rev1    | CTCTGAAAGATCCACATAGATGG       |
| SPECC1L-E9-For3    | CTGATATAAAAATTTTCAGTATCATTTTC |
| SPECC1L-E9-Rev5    | CAGTAAAGAATACCAAATCAGACC      |
| SPECC1L-E10-For1   | TCAGGCGAGTCCTTAAGTGG          |
| SPECC1L-E10-Rev1   | TCTAGATACATCCCTGCTGAGG        |
| SPECC1L-E11-For1   | TGTGTTACAACCTTACTATAGCAG      |
| SPECC1L-E11-Rev1   | ACTCTCTATTACCCATTATGACAG      |
| SPECC1L-E12-For1   | GTTGAAGTTCCTGGATTGG           |
| SPECC1L-E12-Rev1   | GGTGAGAGGACAGCTTGAGG          |
| SPECC1L-E13-For1   | ACTGCACCTGGCCTCACAG           |
| SPECC1L-E13-Rev1   | CACAGTGCTCAAATGCCATC          |
| SPECC1L-E14-For1   | CAGTTAGCAAAGAATTCTGACAAC      |
| SPECC1L-E14-Rev1   | GTGACACGTAGTAAGCTACGAC        |
| SPECC1L-E15-For1   | CAGGTAGCCCTTGGACACAG          |
| SPECC1L-E15-Rev1   | GATCCCAGAAGACCCAGATG          |
| SPECC1L-E16-For1   | AGATGCAGAAGCTCAGGCTC          |
| SPECC1L-E16-Rev1   | CTTTTACCAGGCAGCCACAC          |
| SPECC1L-E17-For1   | AGCAGAGTCTTGGATGATTTTCAG      |
| SPECC1L-E17-Rev1   | AGCCTTCATCAACCCTAGTGAG        |
| SPECC1L-E9-For2    | GCCAAGATGGTCTCGATCTCC         |
| SPECC1L-E9-Rev2    | AGGCTTCTGTCTAAGACTAACAC       |
| SPECC1L-E9-For2    | GCCAAGATGGTCTCGATCTCC         |
| SPECC1L-E9-Rev3    | CTCAAACCTTCTATTAAATATCACC     |

Supplementary Table 2. Rare Variants Fitting Autosomal Dominant Model Detected in Trio.

| Gene      | Genomic location (RefSeq)    | MAF in 1000 Genomes Project | MAF in ESP6500SI | dbSNP       | SIFT | Polyphen2 | cDNA alteration  | Protein alteration | GERP+ + | Other occurrence |
|-----------|------------------------------|-----------------------------|------------------|-------------|------|-----------|------------------|--------------------|---------|------------------|
| FAN1      | 15:31222827 (NM_014967.4)    | -                           | -                | -           | 0    | 1         | 2869G>T          | G957C              | 5.11    | -                |
| VAC14     | 16:70731102 (NM_018052.3)    | -                           | -                | -           | 0    | 0.992     | 1895C>T          | T632M              | 5.05    | -                |
| SPECC1L   | 22:24718137 (NM_015330.4)    | -                           | -                | -           | 0    | 0.995     | 1189A>C          | T397P              | 5.01    | -                |
| C9orf93   | 9:15920397 (NM_173550.2)     | -                           | -                | -           | 0    | 0.999     | 3730C>T          | R1244C             | 4.12    | -                |
| PCSK5     | 9:78506117 (NM_001190482.1)  | -                           | -                | -           | 0    | 0.969     | 20G>A            | C7Y                | 3.43    | -                |
| RGS22     | 8:101018334 (NM_015668.3)    | -                           | -                | -           | 0    | 0.956     | 2365G>A          | E789K              | 2.52    | -                |
| AQP1      | 7:30951801 (NM_198098.2)     | -                           | -                | -           | 0    | 0.988     | 277C>T           | R93C               | 2.47    | -                |
| TREH      | 11:118532621 (NM_007180.2)   | -                           | -                | -           | 0    | -         | 502C>T           | R168C              | -       | -                |
| SP7       | 12:53722988 (NM_001173467.1) | -                           | -                | -           | 0    | -         | 238A>C           | S80R               | -       | -                |
| ZFHX2     | 14:23995258 (NM_033400.2)    | -                           | -                | -           | 0.05 | -         | 3893G>A          | G1298D             | -       | -                |
| TLE2      | 19:3006609 (NM_001144761.1)  | -                           | -                | -           | 0    | -         | 1351G>C          | D451H              | -       | -                |
| MFSD11    | 17:74763505 (NM_001242536.1) | -                           | -                | -           | -    | -         | 565_567delCTT    | L189-              | -       | -                |
| SYT14     | 1:210187111 (NM_001146261.2) | -                           | -                | -           | -    | -         | 331_336delAGTACA | ST111-             | -       | -                |
| SMCHD1    | 18:2732423 (NM_015295.2)     | 0.0005                      | -                | rs113434340 | -    | -         | 3209T>C          | I1070T             | -       | -                |
| KIDINS220 | 2:8925950 (NM_020738.2)      | 0.0005                      | -                | rs144492511 | 0    | 0.983     | 2150C>T          | S717L              | 5.2     | -                |
| CLGN      | 4:141331044 (NM_001130675.1) | -                           | 0.000154         | -           | 0.03 | 0.972     | 224T>C           | V75A               | 5.71    | -                |
| CCDC40    | 17:78061565 (NM_001243342.1) | -                           | 0.000079         | -           | 0.02 | 1         | 2609G>A          | R870H              | 3.33    | -                |
| TUBAL3    | 10:5436423 (NM_024803.2)     | -                           | 0.000077         | -           | 0.02 | -         | 398C>T           | A133V              | -       | -                |
| KCNAB2    | 1:6158552 (NM_001199860.1)   | -                           | -                | -           | 0    | 0.958     | 1022C>T          | P341L              | 5.15    | 1                |
| MTRF1L    | 6:153323630 (NM_001114184.1) | -                           | -                | -           | 0    | 0.971     | 191T>C           | L64S               | 4.55    | 1                |
| S100A10   | 1:151955753 (NM_002966.2)    | -                           | 0.00246          | rs142923959 | 0    | 0.985     | 180C>G           | D60E               | 4.06    | 3                |
| ZNF77     | 19:2934625 (NM_021217.2)     | 0.0005                      | 0.002307         | rs141883841 | 0    | 0.999     | 500G>A           | C167Y              | 2.31    | 3                |
| GOLGB1    | 3:121388135 (NM_001256488.1) | 0.0014                      | 0.001461         | rs114155768 | 0.03 | 0.993     | 9005G>A          | R3002H             | 3.23    | 3                |
| KSR1      | 17:25924412 (NM_014238.1)    | -                           | 0.00016          | -           | 0.04 | -         | 1007C>T          | T336M              | -       | 5                |
| SLCO4A1   | 20:61296353 (NM_016354.3)    | -                           | -                | -           | -    | -         | 1190_1191delICT  | L398fsX551         | -       | 6                |
| DISP2     | 15:40659437 (NM_033510.1)    | -                           | 0.003767         | rs140120816 | 0    | 0.997     | 1124A>T          | Y375F              | 4.75    | 7                |
| DOCK8     | 9:420579 (NM_001190458.1)    | 0.0018                      | 0.002614         | rs116920018 | 0    | 0.999     | 3719A>G          | Y1240C             | 5.68    | 7                |
